# Supplementary material
Source: PubMed Central journal article supplement (PMC1304610)
Supplement: biophysj_87_3_2086__1.pdf [file biophysj_87_3_2086__1.pdf]

**Movie 1.** Translocation of single stranded DNA through a nanopore in  $\text{Si}_3\text{N}_4$ .  
Simulation conditions: Electrical field of  $1.3 \times 10^9$  V/m generates a voltage bias of 21 V across the membrane;  $1.3 \pm 0.1$  nm diameter pore; 5.2 nm thick membrane; single stranded  $(\text{dC})_{20}$ , 1M solution of KCl; 40125 atoms simulated; total simulation time is 1.3 ns; NvT ensemble.

**Movie 2.** Translocation of double stranded DNA through a nanopore in  $\text{Si}_3\text{N}_4$ .  
Simulation conditions: Electrical field  $2.7 \times 10^8$  V/m corresponding to the voltage bias of 4.4 V;  $2.4 \pm 0.2$  nm diameter pore; 5.2 nm thick membrane; double stranded  $(\text{dC})_{20}$ , 1M solution of KCl; 85207 atoms simulated; total simulation time is 3.7 ns; NvT ensemble.

**Movie 3.** Slow electrophoresis of double stranded DNA through a nanopore in  $\text{Si}_3\text{N}_4$ .  
Simulation conditions: Electrical field  $8.7 \times 10^7$  V/m corresponding to the voltage bias of 1.4 V;  $2.4 \pm 0.2$  nm diameter pore; 5.2 nm thick membrane; double stranded  $(\text{dC})_{20}$ , 1M solution of KCl; 85207 atoms simulated; total simulation time is 49.5 ns; NvT ensemble.

**Movie 4.** Spontaneous unzipping of the terminal DNA base pair inside a  $\text{Si}_3\text{N}_4$  nanopore.  
Simulation conditions: Electrical field  $8.7 \times 10^6$  V/m corresponding to the voltage bias of 0.14 V;  $2.4 \pm 0.2$  nm diameter pore; 5.2 nm thick membrane; double stranded  $(\text{dC})_{20}$ , 1M solution of KCl; 85207 atoms simulated; total simulation time is 26 ns; NvT ensemble.

**Movie 5.** DNA is pulled sidewise inside the pore by an applied electrical field.  
Simulation conditions: Electrical field  $8.7 \times 10^7$  V/m corresponding to the voltage bias of 1.4 V;  $2.4 \pm 0.2$  nm diameter pore; 5.2 nm thick membrane; double stranded  $(\text{dC})_{20}$ , 1M solution of KCl; 85207 atoms simulated; total simulation time is 3 ns; NvT ensemble.

**Movie 6.** DNA is pulled sidewise inside the pore by a weak electrical field.  
Simulation conditions: Electrical field  $2.7 \times 10^7$  V/m corresponding to the voltage bias of 0.44 V;  $2.4 \pm 0.2$  nm diameter pore; 5.2 nm thick membrane; double stranded  $(\text{dC})_{20}$ , 1M solution of KCl; 85207 atoms simulated; total simulation time is 4 ns; NvT ensemble.
